# Supplementary material for: A typology of responsibility for coastal flood risk adaptation
Source: Frontiers journal article supplement (doi:10.3389/fmars.2022.954950), 2022-09-23
Supplement: Table_1.DOCX [file Table_1.DOCX]

Supplementary Material

List of all survey variables and questions for survey distributed to 1553 households in Lincolnshire, UK, in 2019, of which 143 were returned.

| **Process** | **Category** | **Sub-category** | **Variable (question number in survey)** | **Survey question** | **Response type** |
| --- | --- | --- | --- | --- | --- |
| Cognitive mediating process | Responsibility appraisal | Perceived self-responsibility | (15d) Local household risk awareness | To what extent do you agree or disagree with the following statements? d. Households in Boston are aware of their coastal flood risk | Likert scale |
| (15e) Local household responsibility attitudes | To what extent do you agree or disagree with the following statements? e. Households in Boston feel responsible for preventing damage to their own homes from coastal flooding | Likert scale |
| (15f) Local household preparedness knowledge | To what extent do you agree or disagree with the following statements? f. Households in Boston know what to do if a coastal flood occurs | Likert scale |
| Perceived other-responsibility | (13) Perceived institutional (various) responsibility for flood preparedness: organisations who are responsible | To the best of your knowledge, who do you think is responsible for managing coastal flood risk in Boston? | Multiple choice |
| (14) Perceived institutional (various) responsibility for flood preparedness: organisations who should be responsible | To the best of your knowledge, who do you think should be responsible for managing coastal flood risk in Boston? | Multiple choice |
| (15a) Central authority as responsible | To what extent do you agree or disagree with the following statements? a. National Government is responsible for making sure my household is prepared for coastal flooding | Likert scale |
| Threat appraisal | Perceived probability | (11a) Expectation of future flooding: area | Based on the past 10 years: How likely is it that Boston will be flooded by a coastal flood at least once in the next 10 years? | Likert scale |
| (11b) Expectation of future flooding: home | Based on the past 10 years: a coastal flood were to occur in the next 10 years, how likely do you think is that your home will flood? | Likert scale |
| Perceived severity | (12d) Expected effect of future flood on quality of life | To what extent do you agree or disagree with the following statements? d) I am worried about the potential of future coastal floods to reduce my quality of life | Likert scale |
| (12e) Expected effect of future flood on building | To what extent do you agree or disagree with the following statements? e) I am worried about the potential of future coastal floods to damage my home’s building structure | Likert scale |
| (12f) Expected effect of future flood on possessions | To what extent do you agree or disagree with the following statements? f) I am worried about the potential of future coastal floods to damage my possessions | Likert scale |
| Coping appraisal | Protective response efficacy | (12c) Efficacy of specific structural/non-structural measures: insurance for contents | To what extent do you agree or disagree with the following statements? c) If coastal flooding occurs, I am confident my insurance will cover any damage caused to my home contents | Likert scale |
| (12b) Efficacy of specific structural/non-structural measures: insurance for building | To what extent do you agree or disagree with the following statements? b) If coastal flooding occurs, I am confident my insurance will cover any damage caused to my home’s building structure | Likert scale |
| (26e) Household general increase in safety | To what extent do you agree or disagree with the following statements? e) Preparing for coastal flooding would increase my household’s safety | Likert scale |
| Perceived self-efficacy | (26h) Helplessness | To what extent do you agree or disagree with the following statements? h) When I think about a potential coastal flood, I feel helpless | Likert scale |
| (26f) Time consumption of preparedness | To what extent do you agree or disagree with the following statements? f) Preparing my home for coastal flooding would be too time-consuming | Likert scale |
| (12a) Ability to avoid consequences | To what extent do you agree or disagree with the following statements? a) If coastal flooding occurs, I am confident my household resilience/resistance measures will protect my home from the flood’s consequences | Likert scale |
| (15g1) Identification of self as capable of acting on responsibilities | To what extent do you agree or disagree with the following statements? g1. My household is capable of avoiding the consequences of coastal flooding to my home | Likert scale |
| (15g2) Self-reliance in responsibility: for what to do and how to do it. | To what extent do you agree or disagree with the following statements? g2. My household is confident to prepare my home for coastal flooding | Likert scale |
| (26a) Household general ability to take effective measures | To what extent do you agree or disagree with the following statements? a) Households are able to take effective coastal flood preparedness measures for their home | Likert scale |
| Protective response costs | (26b) Costs of action versus inaction | To what extent do you agree or disagree with the following statements? b) The costs of my household preparing for coastal flooding are less than the costs of doing nothing | Likert scale |
| (26c) Perceived impact on appearance | To what extent do you agree or disagree with the following statements? c) Preparing my home for coastal flooding would improve its appearance | Likert scale |
| (26d) Perceived impact on value of home | To what extent do you agree or disagree with the following statements? d) Preparing my home for coastal flooding would increase the value of the building | Likert scale |
| (26g) Ability to afford preparedness | To what extent do you agree or disagree with the following statements? g) I could afford to prepare my home for coastal flooding | Likert scale |
| Sources of information | Environmental | Verbal persuasion | (15c) FRM, soft interventions: local strategic plans | To what extent do you agree or disagree with the following statements? c. There are local strategic flood plans to increase my household’s safety in coastal flooding | Likert scale |
| (25) Organisations who have encouraged household preparedness | 25. In the last 10 years, have any of the following organisations encouraged you to prepare for coastal flooding? | Multiple choice |
| (21) Signed up for flood warnings | 21. Are you signed up to receive flood warnings by phone, email or text message? | Multiple choice |
| (22) Format of preparedness communications | 22. In the past 10 years, have you ever received communications about preparing for coastal flood risk in Boston? | Multiple choice |
| (23) Content of preparedness communications | 23. Do you remember what the communications were about? | Multiple choice |
| (24) Insurer encouraged preparedness | 24. In the last 10 years, has your home insurer encouraged you to prepare for coastal flooding? | Multiple choice |
| (15b) FRM, hard interventions: local flood defences | To what extent do you agree or disagree with the following statements? b. There are public flood defences that increase my household’s safety in coastal flooding | Likert scale |
| Observational learning | (18a) Social networks: engagement in local community | Your attitude toward risks and place attachment may affect your views in coastal flood risk and preparedness for it. To what extent do you agree or disagree with the following statements? a) In general, I am engaged in my local community | Likert scale |
| (15h) Help from neighbours in case of flood | To what extent do you agree or disagree with the following statements? 15h. If my home was flooded, I know neighbours/friends/family who could help me recover | Likert scale |
| (16) Member of community group | Are you a member of any local groups? | Multiple choice |
| (17) Aware of local flood group | Is there a local community group who can help you prepare for coastal flooding? | Multiple choice / open |
| Intrapersonal | Socio-demographic and economic | (32) Age | 32. What is your age? | Open |
| (33) Gender | 33. Which of the following describes how you think of yourself? | Multiple choice |
| (34) Education | 34. What is your highest educational qualification? | Multiple choice |
| (38) Income | 38. Which of these best describes your disposable household income last year? | Multiple choice |
| (35) Home ownership | 35. Which of the following best describes your residential status? | Multiple choice |
| (36) Type of home | 36. Which of the following best describes your primary place of residence? | Multiple choice |
| (37) Household size and ages | 37. Including yourself how many people live in your household? (include those aged 16 and over) | Open |
| Personality and trust | (18b) Risk attitudes: prefer to act on short-term risks | Your attitude toward risks and place attachment may affect your views in coastal flood risk and preparedness for it. To what extent do you agree or disagree with the following statements? b) I prefer to act on short-term risks than worry about long-term risks | Likert scale |
| (18d) Risk attitudes: risk information seeking | Your attitude toward risks and place attachment may affect your views in coastal flood risk and preparedness for it. To what extent do you agree or disagree with the following statements? d) In general, I like to seek out information on risks in my life | Likert scale |
| (18e) Trust: insurance makes households feel safe | Your attitude toward risks and place attachment may affect your views in coastal flood risk and preparedness for it. To what extent do you agree or disagree with the following statements? e) Being insured for risks makes me feel safe | Likert scale |
| (18f) Trust: insurance is a good thing to have, just in case | Your attitude toward risks and place attachment may affect your views in coastal flood risk and preparedness for it. To what extent do you agree or disagree with the following statements? f) Insurance is a good thing to have, just in case something goes wrong | Likert scale |
| (18c) Protection responsibility attitudes: feel safe without household resilience/resistant measures | Your attitude toward risks and place attachment may affect your views in coastal flood risk and preparedness for it. To what extent do you agree or disagree with the following statements? c) Without household resilience/resistant measures to manage coastal flooding, you can live in Boston just as well. | Likert scale |
| (18g) Place attachment: home attachment | Your attitude toward risks and place attachment may affect your views in coastal flood risk and preparedness for it. To what extent do you agree or disagree with the following statements? g) I am very attached to the home I live in | Likert scale |
| (18h) Place attachment: area attachment | Your attitude toward risks and place attachment may affect your views in coastal flood risk and preparedness for it. To what extent do you agree or disagree with the following statements? h) Boston is the best place for what I like to do | Likert scale |
| (39) Cultural attitudes: 12 cultural cognition questions | 39. Cultural attitudes and perceptions have been found to affect household perceptions of flood risk and preparedness. To what extent do you agree or disagree with the following statements?   1. We have gone too far in pushing equal rights in this country. 2. Society as a whole has become too soft and feminine. 3. It seems like the criminals and welfare cheats get all the breaks, while the average citizen picks up the tab. 4. Our society would be better off if the distribution of wealth was more equal. 5. We need to dramatically reduce inequalities between the rich and the poor, whites and people of colour, and men and women. 6. Discrimination against minorities is still a very serious problem in our society. 7. It’s not the government’s business to try to protect people from themselves. 8. The government should stop telling people how to live their lives. 9. Our government tries to do too many things for too many people. We should just let people take care of themselves. 10. The government should do more to advance society’s goals, even if that means limiting the freedom and choices of individuals. 11. Sometimes government needs to make laws that keep people from hurting themselves. 12. l) It’s society’s responsibility to make sure everyone’s basic needs are met. | Likert scale |
| Experience and knowledge | (19) Knowledge of physical exposure: distance to coast | 19. What distance would you estimate your home is from the coast? | Open |
| (2) Knowledge of physical exposure: Flood Zone | 20. Do you know what flood zone your home is in? | Multiple choice |
| (29) Physical exposure: address | 29. What is your address? | Open |
| (30) Physical exposure: length of residency at address | 30. When did you move to this address? | Open |
| (31) Physical exposure: length of residency in area | 31. When did you move to Boston? | Open |
| (10) Experience of evacuation | 10. In the past 10 years, have you experienced an evacuation because of flooding? | Multiple choice |
| (1) Direct/indirect experience: flooding in area | 1. In the past 10 years, have you ever experienced a flood anywhere? | Multiple choice |
| (2) Direct/indirect experience: experience description | 2. How would you describe this/these flood experience(s)? | Multiple choice |
| (3) Direct/indirect experience: type of flooding, area | 3. Of the floods you experienced in the past 10 years, do you remember what type(s) of flooding it was? | Multiple choice |
| (6) Direct/indirect experience: flooding of home | 6. In the past 10 years, has your home been flooded? | Multiple choice |
| (8) Direct/indirect experience: type of flooding, home | 8. Regarding the most recent flood event that flooded your home: do you remember what type of flooding it was? | Multiple choice |
| (Ex) Event frequency: perceived regularity of flood events | Ex. Regarding coastal flooding in YOUR AREA, to what extent do you agree or disagree with the following statement: coastal flood events impacting public and/or private property occur regularly in YOUR AREA | Likert scale |
| (4) Event recency: year of flooding, area | 4. In the past 10 years, when was the most recent flood event you experienced? | Multiple choice |
| (7) Event recency: year of flooding, home | 7. In the past 10 years, when was the most recent time your home was flooded? | Multiple choice |
| (5) Learning and interpretation of experience | 5. How did this most recent experience of being flooded make you feel? | Multiple choice |
| (9) Learning and interpretation of experience | 9. Regarding the most recent flood event that flooded your home: did you…  A. Make physical changes to increase the resistance or resilience of your home?  B. Change your behaviour or plans regarding any future potential floods? | Multiple choice |
| Coping response | Planning | | 28. Uptake of planning activities | 28. When was the most recent instance you undertook each of the following planning activities? | Scale of how recent an action was taken:   1. Emergency plan 2. Planning in case of flood 3. Participation in local flood group 4. Attending information session 5. Paying attention to warnings 6. Participation in evacuation drill 7. Informed about insurance 8. Informed about adaptation measures 9. Informed about risk of flooding 10. Reading information leaflets 11. Storing relevant numbers 12. Discussion with neighbours 13. Relocation 14. Consideration of relocation |
| Structural | | 27. Structural actions taken to prepare | 27. Which of the following technical/structural actions have you undertaken to prepare your household for coastal flooding? | Multiple choice   1. Sandbags/barriers 2. Pump 3. Main rooms upstairs 4. Machines above flood level 5. Furniture placement 6. Power generator 7. Breeze blocks 8. Raised hazarouds substances 9. Protective barrier/wall 10. Emergency kit 11. Electricity switch 12. Elevated documents 13. Elevated valuables 14. Opening on roof 15. Refuge zone 16. Water resistant floor 17. Water resistant wall 18. Elevated power sockets 19. Elevated boiler 20. Flood-safe heating 21. Non-return valves 22. Strengthened foundations 23. Other |
